# Supplementary material for: Chemically recyclable and mechanically robust non-isocyanate polyurethanes from resveratrol
Source: Royal Society of Chemistry journal article supplement (doi:10.1039/d3py00732d), 2023-01-01
Supplement: d3py00732d1.pdf [file d3py00732d1.pdf]

## Supporting Information

### **Chemically Recyclable and Mechanically Robust Non-isocyanate Polyurethane from Resveratrol**

Pengcheng Miao, Xuefei Leng\*, Jie Liu, Xiaobo Xu, and Yang Li\*

State Key Laboratory of Fine Chemicals, Department of Polymer Science and Engineering,  
Liaoning Key Laboratory of Polymer Science and Engineering, School of Chemical Engineering,  
Dalian University of Technology, Dalian 116024, China.

Corresponding authors:

\*E-mail: liyang@dlut.edu.cn (Y. Li)

\*E-mail: lengxuefei@dlut.edu.cn (X. Leng)

**The PDF file includes:**

Supplementary Information

**A. Materials**

**B. Instrumentation**

**C. Synthetic and degradation procedures**

**D. Characterization tables and figures**

**Figure S1-S6** NMR spectra of the synthetic compounds.

**Table S1** Formulas for the preparation of RE-PHUs

**Figure S7.** Photos of (a) the RE-PHU films and (b) the dog-bone RE-PHU samples.

**Figure S8.** DSC curves of RE-PHUs with different diamines.

**Table S2.** Detailed data on thermal properties of RE-PHUs.

**Figure S9.** TGA curves of RE-PHU-13.

**Table S3.** Dynamic data of RE-PHU-13.

**Calculations for stress relaxation derived activation energy.**

**Figure S10.** TGA curves of original and remolding RE-PHU-13.

**Figure S11.** POM (50  $\mu\text{m}$ ) images of original and remolding samples (boundary of clipped pieces).

**Figure S12.** MS spectrum of recycled RE-OH.

**Figure S13.** MS spectrum of recycled RE-TCC.

**Figure S14.**  $^1\text{H}$  NMR spectra of the by-product of degradation.

**Figure S15.**  $^1\text{H}$  NMR spectra of MC.

## Materials

3-Methyl-3-oxetanemethanol (96%), 48% hydrobromic acid, 2,2-dimethoxypropane (99%), resveratrol (RE, 98%), *p*-toluenesulfonic acid monohydrate (98%), concentrated hydrochloric acid, tetrabutylammonium bromide (TBAB, 99%), *N,N'*-dimethylformamide (DMF, extra dry over molecular sieves, 99.8%), *p*-toluenesulfonyl chloride (TsCl, 99%), *N,N,N',N'*-tetramethylethylenediamine (TMEDA, 99%), 1,3-diaminopropane, 1,6-diaminohexane, 1,12-diaminododecane, 4,7,10-trioxa-1,13-tridecanediamine (DEGDA) were obtained from Energy Chemical and used without further purification. All other chemicals were obtained from Sinopharm and used without further purification unless stated.

## Instrumentation

<sup>1</sup>H NMR and <sup>13</sup>C NMR spectra were performed on the Varian DLG400 MHz nuclear magnetic resonance spectrometer at room temperature using methyl sulfoxide-*d*<sub>6</sub> (DMSO-*d*<sub>6</sub>) or chloroform (CDCl<sub>3</sub>) as solvent and tetramethylsilane as the internal standard.

Fourier transform infrared (FT-IR) spectra were performed on a Thermo Nicolet Nexus 470 FT-IR spectrometer through attenuated total reflectance (ATR) method with the wavelength range of 650-4000 cm<sup>-1</sup>.

High-resolution time-of-flight liquid chromatography/mass spectrometry (TOF-LC/MS) was performed on an Agilent 6224 mass spectrometer.

Thermogravimetric analysis (TGA) was performed on a TA-Q500 under N<sub>2</sub> atmosphere with a heating rate of 10°C/min.

Differential scanning calorimetry (DSC) was performed on a TA-Q2000 under N<sub>2</sub> atmosphere with a heating rate of 10°C/min.

Dynamic mechanical thermal analysis was performed on TA-Q800 using dog-bone-shaped samples at a heating rate of 3°C/min and frequency of 1Hz in single cantilever mode.

Mechanical properties were measured on a universal testing machine (Instron 5567AR265) using dog-bone-shaped samples at room temperature.

Stress relaxation analysis (SRA) was performed on TA-Q800 using dog-bone-shaped

samples, and the stress decay was monitored under a strain-controlled mode at the specified temperatures (190-250°C).

High-performance liquid chromatography (HPLC) was performed on Agilent 1100 reversed phase, the mobile phase was MeOH and H<sub>2</sub>O.

A dissolution method was employed to measure the gel fraction of the RE-PHUs. The cross-linked samples (W1) were immersed in tetrahydrofuran (THF) for 48 h. The insoluble moieties were dried to a constant weight (W2) by vacuum drying. The gel fraction (Gf) was obtained according to the following equation:

$$G_f = \frac{W_2}{W_1} \times 100\%$$

## Synthetic procedures

### Scheme S1. Degradation of RE-PHU.

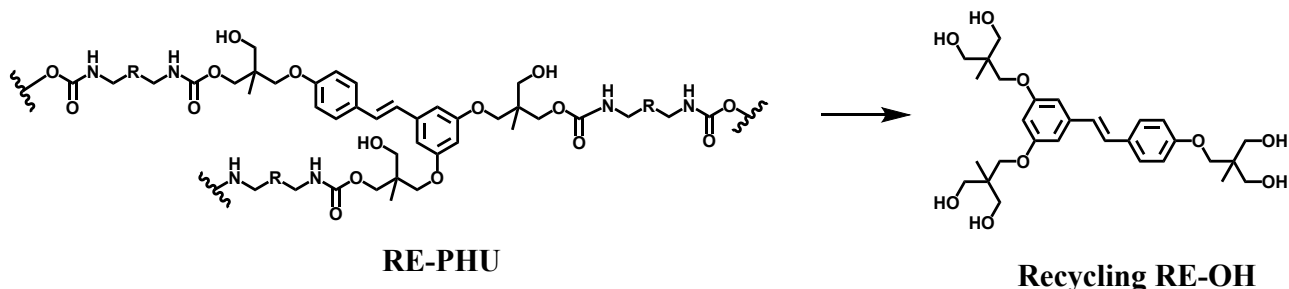

*Degradation of RE-PHU:* By mixing RE-PHU, 20 wt% aqueous NaOH, and methanol in a round bottom flask at 70°C for 3 h, a degraded solution was obtained. Adjust PH = 7 by concentrated hydrochloric acid, and remove organic solvents by rotary evaporator to collect white precipitate. Yield: 97%, purity: 98.11%. The structure of the product was determined by <sup>1</sup>H-NMR, and the spectra were presented in Figure 4b.

### Scheme S2. Model reaction

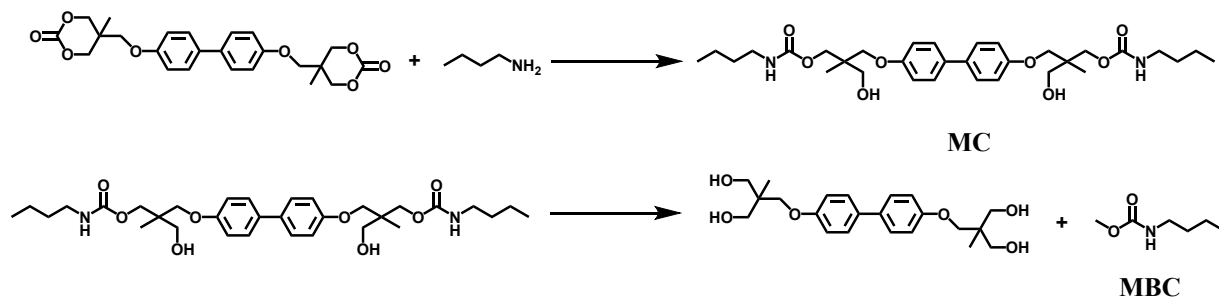

*Model compound (MC):* By mixing BCC-BP (1 eq), butylamine (4 eq), and anhydrous DMF (0.5 M) in a round bottom flask at 70°C overnight, a colorless and transparent solution was obtained. The solution was concentrated under reduced pressure. The crude material was dissolved in a suitable amount of CH<sub>2</sub>Cl<sub>2</sub> and filtered through a plug of silica gel, eluting with 50% EtOAc in CH<sub>2</sub>Cl<sub>2</sub>. The filtrate was then concentrated using a rotary evaporator. Yield: 90%.

*Model of degradation experiment:* By mixing MC, 20 wt% aqueous NaOH, and methanol in a round bottom flask at 90°C for 3 h, a degraded solution was obtained. Adjust the pH of the solution to 7 and collect the filtrate by filtration. The excess methanol was removed by rotary evaporation. The methyl butylcarbamate (MBC) was obtained by reduced decompression distillation. Yield: >95%.

**Scheme S3.** Speculative mechanism for the degradation experiments.

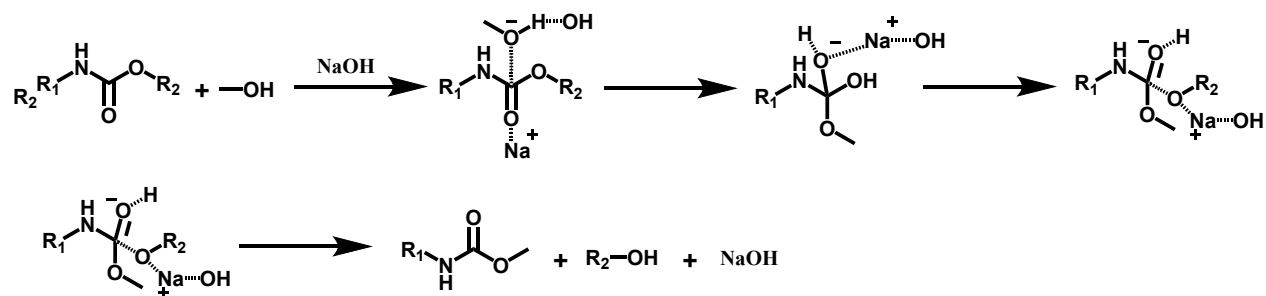

## Characterization Tables and Figures

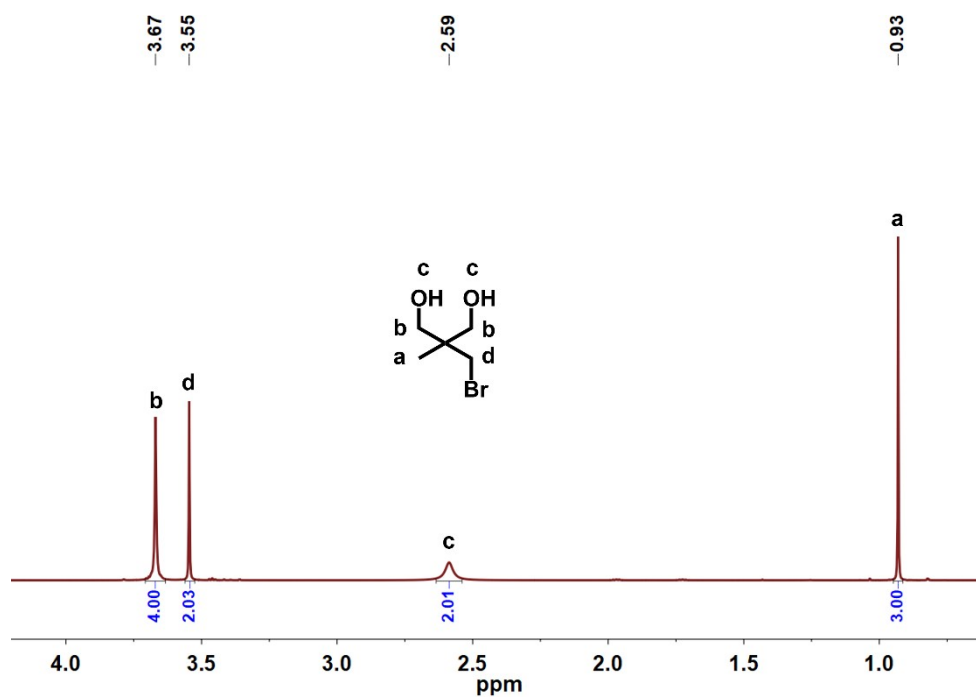

**Figure S1.** <sup>1</sup>H NMR spectra of 2-bromomethyl-2-methyl-1,3-propanediol and peak assignment.

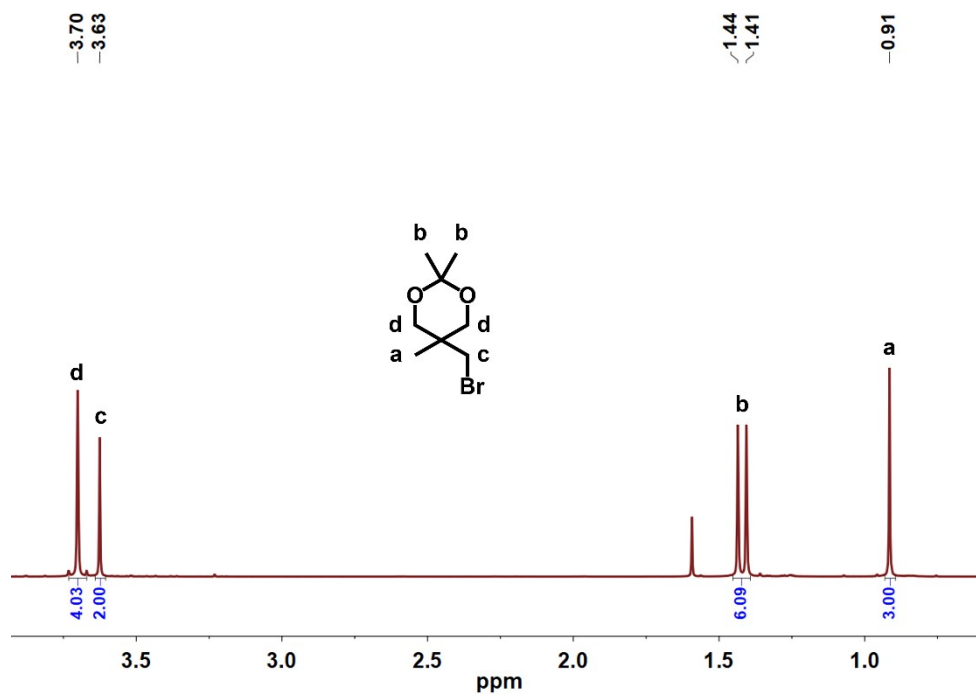

**Figure S2.** <sup>1</sup>H NMR spectra of BMTD and peak assignment.

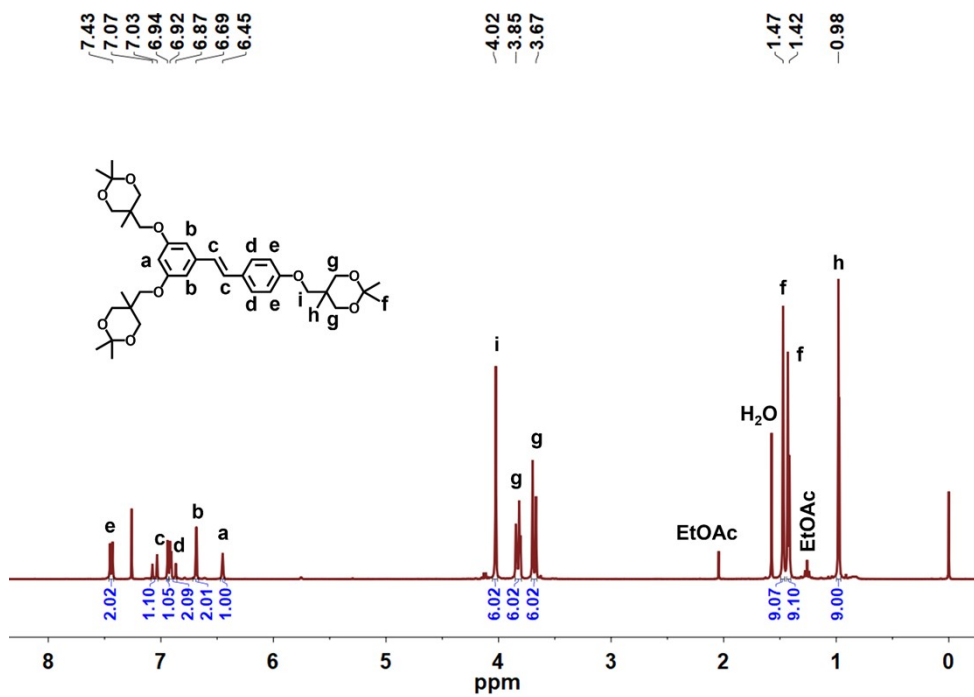

**Figure S3.** <sup>1</sup>H NMR spectra of RE-BMTD

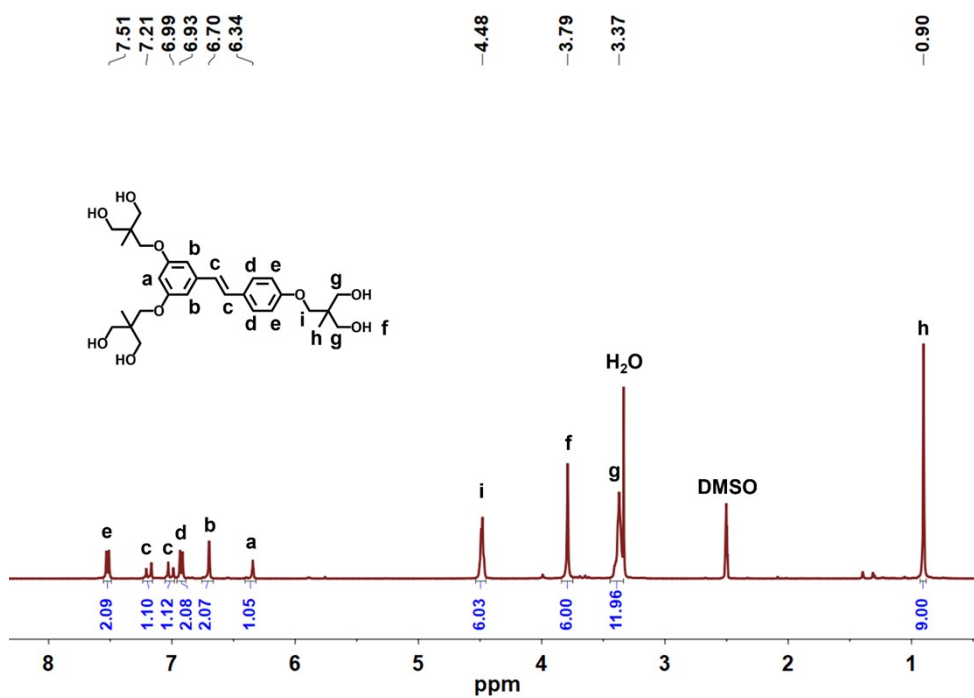

**Figure S4.** <sup>1</sup>H NMR spectra of RE-OH and peak assignment.



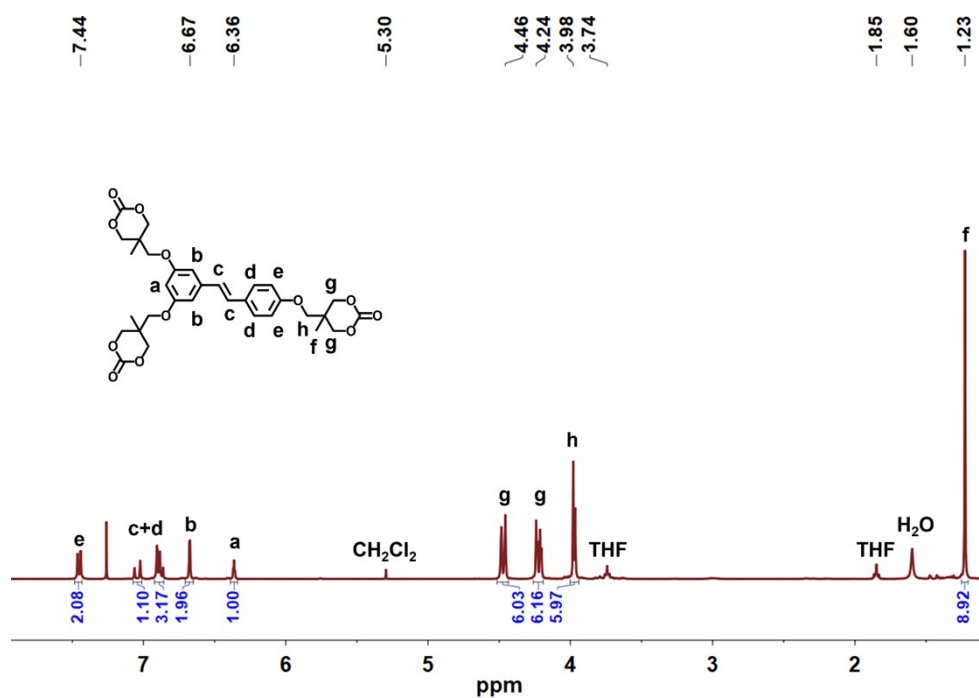

Figure S5. <sup>1</sup>H NMR spectra of RE-TCC and peak assignment.

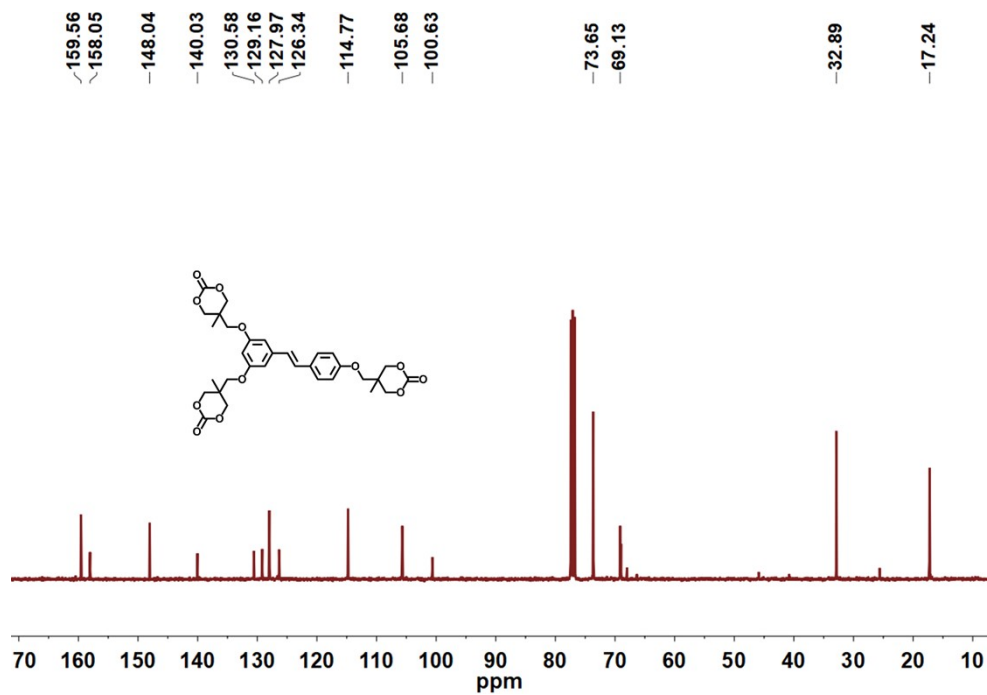

Figure S6. <sup>13</sup>C NMR spectra of RE-TCC.

**Table S1.** Formulas for the preparation of RE-PHUs

| Sample    | Diamine                             | Ratio <sup>a</sup> |
|-----------|-------------------------------------|--------------------|
| RE-PHU-3  | 1,3-diaminopropane                  | 1                  |
| RE-PHU-6  | 1,6-diaminohexane                   | 1                  |
| RE-PHU-12 | 1,12-diaminododecane                | 1                  |
| RE-PHU-13 | 4,7,10-trioxa-1,13-tridecanediamine | 1                  |

<sup>a</sup>Ratio=amino molar content/cyclic carbonate molar content.

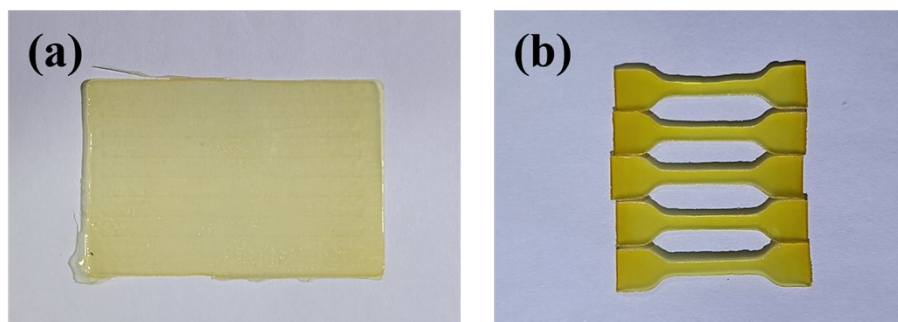

**Figure S7.** Photos of (a) the RE-PHU films and (b) the dog-bone RE-PHU samples.

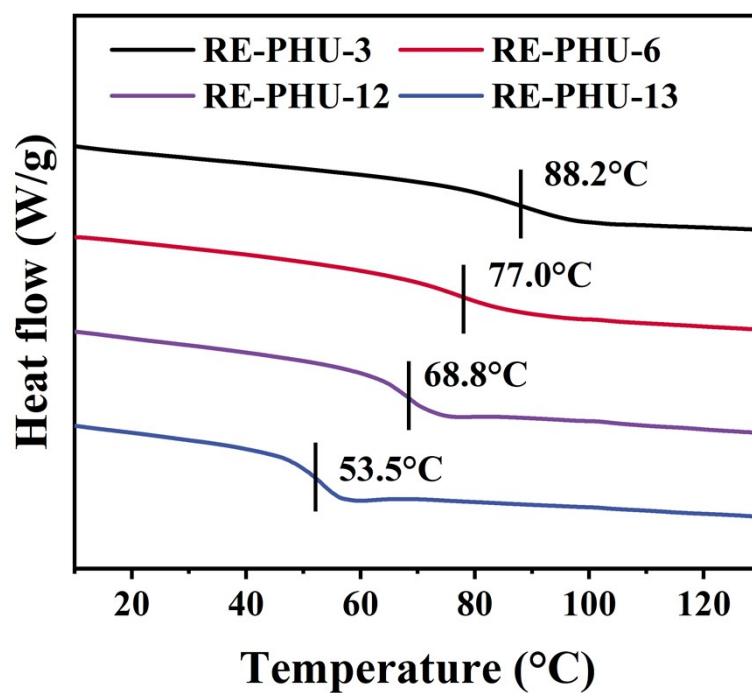

**Figure S8.** DSC curves of RE-PHUs with different diamines.

**Table S2.** Detailed data on thermal properties of RE-PHUs.

| Sample    | $T_g/^\circ\text{C}^a$ | $T_g/^\circ\text{C}^b$ | $E'/\text{MPa}$ | $\nu/(\text{mol}/\text{m}^3)^c$ |
|-----------|------------------------|------------------------|-----------------|---------------------------------|
| RE-PHU-3  | 88.2                   | 117.2                  | 4.60            | 418.3                           |
| RE-PHU-6  | 77.0                   | 108.1                  | 3.71            | 344.9                           |
| RE-PHU-12 | 68.8                   | 91.3                   | 3.08            | 298.0                           |
| RE-PHU-13 | 53.5                   | 76.2                   | 2.80            | 281.1                           |

<sup>a</sup>Determined by DSC. <sup>b</sup>Determined by DMA. <sup>c</sup>Calculated from eq 1.

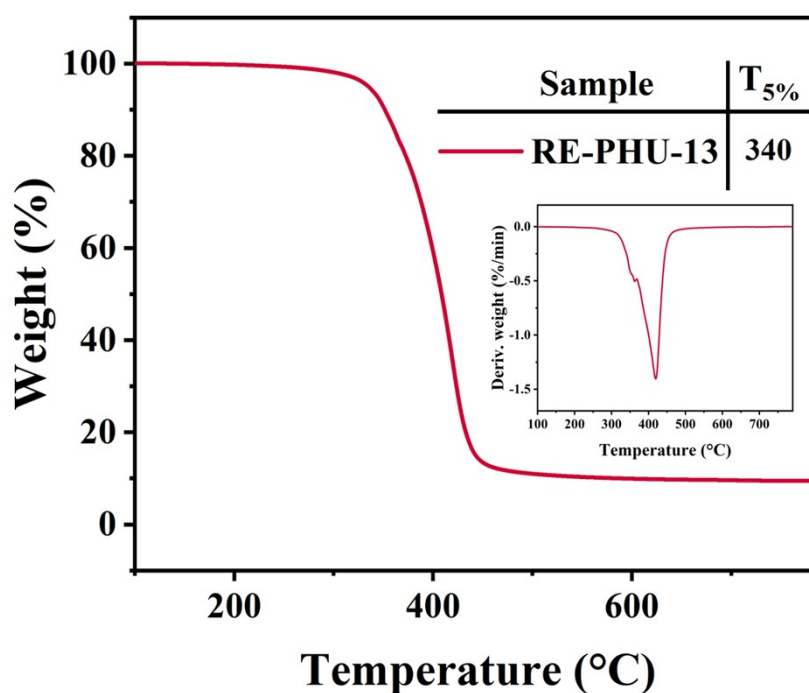**Figure S9.** TGA curves of RE-PHU-13.**Table S3.** Dynamic data of RE-PHU-13.

| Sample    | $E_a/(\text{kJ}/\text{mol})$ | $\ln(\tau_0)$ | $\tau^*/\text{min}$ |      |      |     |
|-----------|------------------------------|---------------|---------------------|------|------|-----|
|           |                              |               | 190                 | 210  | 230  | 250 |
| RE-PHU-13 | 107.5                        | -18.8         | 160.7               | 48.2 | 17.7 | 6.4 |
| RE-PHU-12 | 103.9                        | -18.0         | 140.3               | 45.4 | 16.1 | 6.4 |
| RE-PHU-6  | 98.1                         | -16.7         | 103.8               | 40.6 | 14.1 | 5.7 |
| RE-PHU-3  | 90.6                         | -15.2         | 65.7                | 28.7 | 10.6 | 4.6 |

### Calculations for stress relaxation derived activation energy.

RE-PHU-13:

Equation obtained from Arrhenius law:  $y = 12.93x - 18.76$ ,  $R^2 = 0.99944$

Corresponding equation:  $\ln(\tau^*) = 12.93 \times 1000/T - 18.76$

Identifying this to the experimental equation:  $E_a/R = 12.93$

$$E_a = 12.93 \times 8.314 = 107.50 \text{ kJ/mol}$$

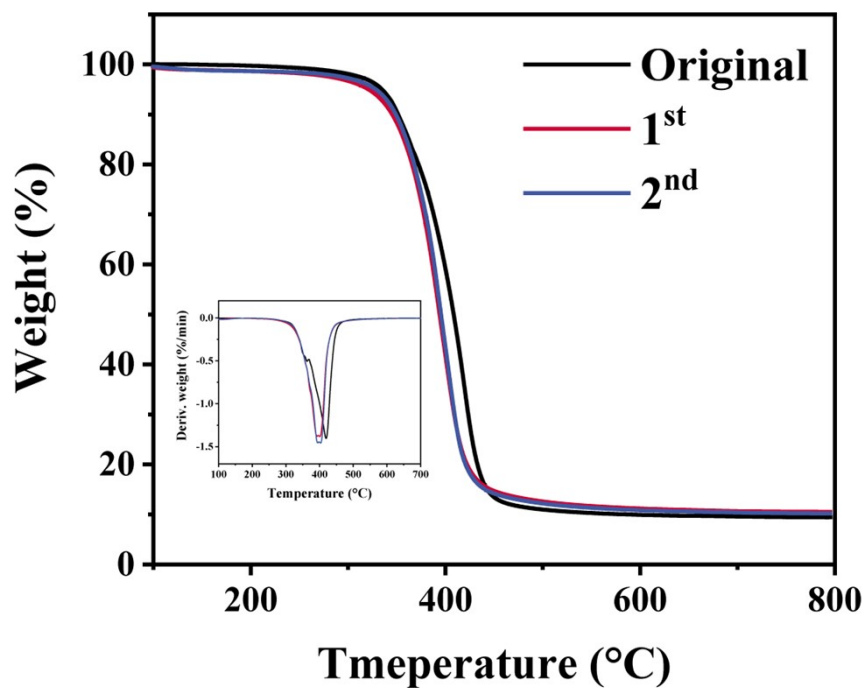

**Figure S10.** TGA curves of original and remolding RE-PHU-13.

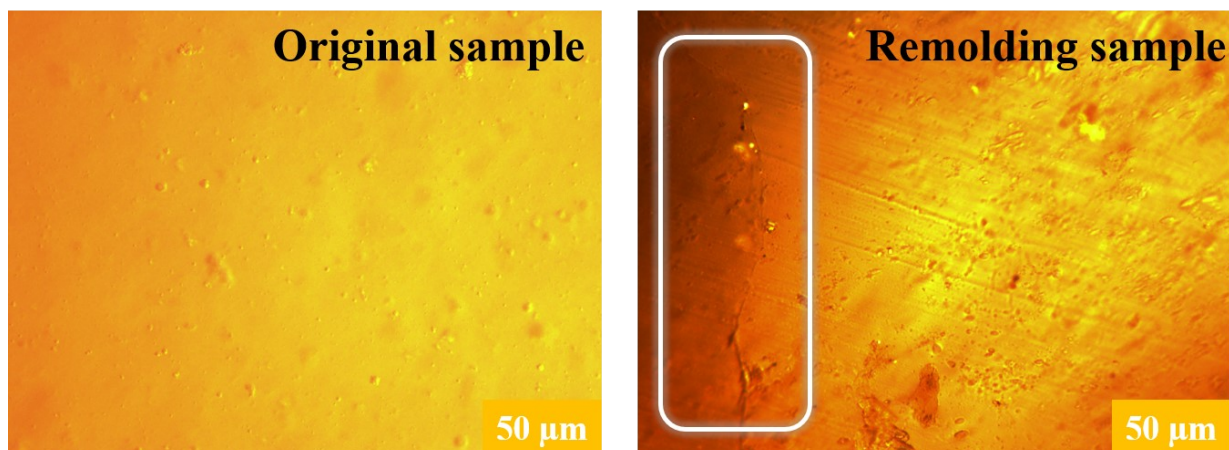

**Figure S11.** POM (50  $\mu\text{m}$ ) images of original and remolding samples (boundary of clipped pieces).

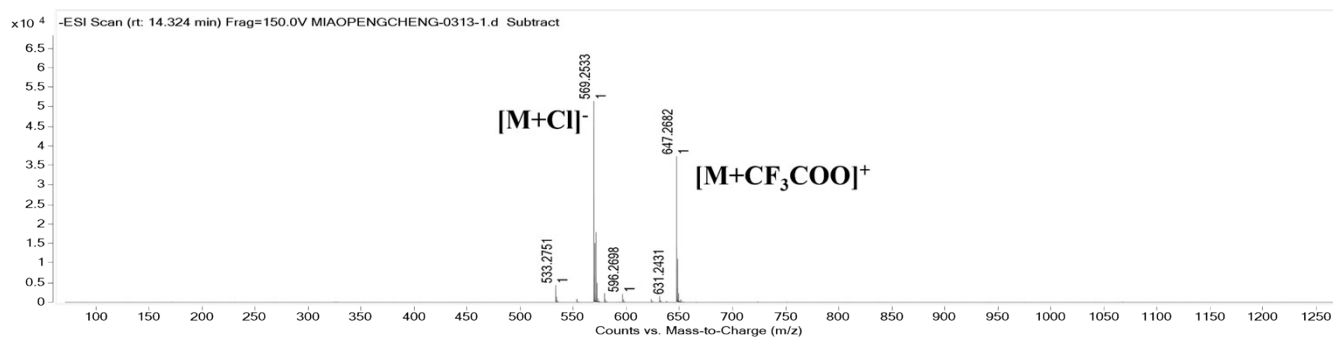

Figure S12. MS spectrum of regenerated RE-OH.

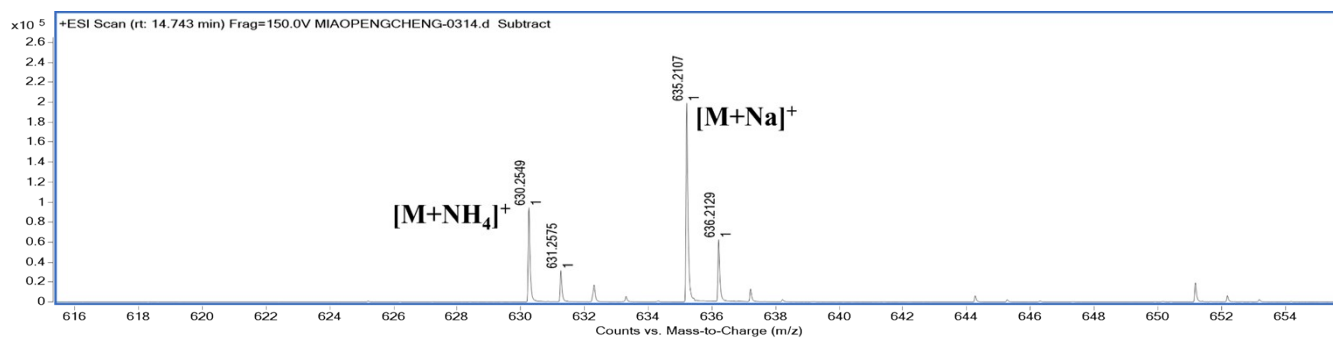

Figure S13. MS spectrum of regenerated RE-TCC.

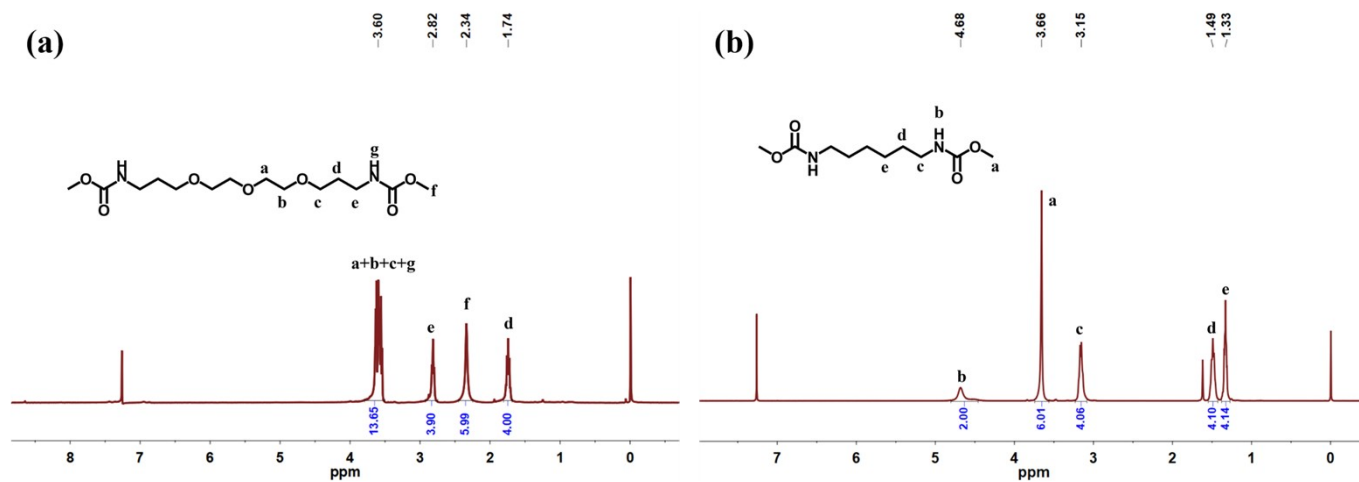

Figure S14. <sup>1</sup>H NMR spectra of the by-product of degradation.

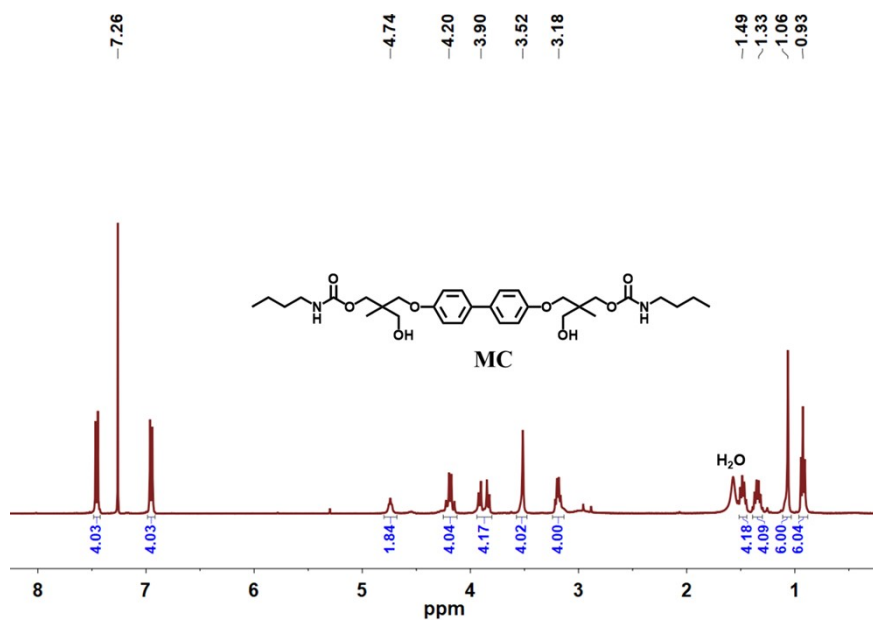

Figure S15. <sup>1</sup>H NMR spectra of MC.
